# Supplementary material for: Expanding the molecular landscape of childhood apraxia of speech: evidence from a single-center experience
Source: Front Neurosci. 2024 Sep 24;18:1396240. doi: 10.3389/fnins.2024.1396240 (PMC11459770; doi:10.3389/fnins.2024.1396240)
Supplement: Supplementary file 1 [file Table_1.xlsx]

## Sheet: Foglio1
Supplementary Table 1. List of genes identified in CAS phenotype
Gene	MIM# number	Reference
CNTNAP2	604569	Centanni T M et al.; The role of candidate-gene CNTNAP2 in childhood apraxia of speech and specific language impairment. Am J Med Genet B Neuropsychiatr Genet. 2015	PMID: 26097074
FOXP2	605317	Lai CS et al.; A forkhead-domain gene is mutated in a severe speech and language disorder. Nature 2001	PMID: 11586359
GRIN2A	138253	Carvill GL et al.; GRIN2A mutations cause epilepsy-aphasia spectrum disorders. Nat Genet 2013, Hildebrand MS et al.; Severe childhood speech disorder: gene discovery highlights transcriptional dysregulation. Neurology 2020	PMID: 32345733
AUTS2	607270	Graham SA and Fisher SE; Understanding language from a genomic perspective. Annu Rev Genet. 2015	PMID: 26442845
CTNND2	604275	Graham SA and Fisher SE; Understanding language from a genomic perspective. Annu Rev Genet. 2015	PMID: 26442845
DOCK4	607679	Graham SA and Fisher SE; Understanding language from a genomic perspective. Annu Rev Genet. 2015	PMID: 26442845
FOXP1	605515	Graham SA and Fisher SE; Understanding language from a genomic perspective. Annu Rev Genet. 2015	PMID: 26442845
NFXL1	620488	Graham SA and Fisher SE; Understanding language from a genomic perspective. Annu Rev Genet. 2015	PMID: 26442845
SRPX2	300642	Graham SA and Fisher SE; Understanding language from a genomic perspective. Annu Rev Genet. 2015	PMID: 26442845
BCL11A	60655	Morgan AT et al.; Early speech development in Koolen de Vries syndrome limited by oral praxis and hypotonia. Eur J Hum Genet. 2018	PMID: 29225339
ERC1	607127	Morgan AT et al.; Early speech development in Koolen de Vries syndrome limited by oral praxis and hypotonia. Eur J Hum Genet. 2018	PMID: 29225339
KANSL1	612452	Morgan AT et al.; Early speech development in Koolen de Vries syndrome limited by oral praxis and hypotonia. Eur J Hum Genet. 2018	PMID: 29225339
CDK13	603309	Hildebrand MS et al.; Severe childhood speech disorder: Gene discovery highlights transcriptional dysregulation. Neurology 2020	PMID: 32345733
EBF3	607407	Hildebrand MS et al.; Severe childhood speech disorder: Gene discovery highlights transcriptional dysregulation. Neurology 2020	PMID: 32345733
GNAO1	139311	Hildebrand MS et al.; Severe childhood speech disorder: Gene discovery highlights transcriptional dysregulation. Neurology 2020	PMID: 32345733
GNB1	139380	Hildebrand MS et al.; Severe childhood speech disorder: Gene discovery highlights transcriptional dysregulation. Neurology 2020	PMID: 32345733
DDX3X	300160	Hildebrand MS et al.; Severe childhood speech disorder: Gene discovery highlights transcriptional dysregulation. Neurology 2020	PMID: 32345733
MEIS2	601740	Hildebrand MS et al.; Severe childhood speech disorder: Gene discovery highlights transcriptional dysregulation. Neurology 2020	PMID: 32345733
POGZ	614787	Hildebrand MS et al.; Severe childhood speech disorder: Gene discovery highlights transcriptional dysregulation. Neurology 2020	PMID: 32345733
SETBP1	611060	Hildebrand MS et al.; Severe childhood speech disorder: Gene discovery highlights transcriptional dysregulation. Neurology 2020	PMID: 32345733
UPF2	605529	Hildebrand MS et al.; Severe childhood speech disorder: Gene discovery highlights transcriptional dysregulation. Neurology 2020	PMID: 32345733
ZNF142	604083	Hildebrand MS et al.; Severe childhood speech disorder: Gene discovery highlights transcriptional dysregulation. Neurology 2020	PMID: 32345733
PTBP2	608449	Hildebrand MS et al.; Severe childhood speech disorder: Gene discovery highlights transcriptional dysregulation. Neurology 2020	PMID: 32345733
ZKSCAN1	601260	Hildebrand MS et al.; Severe childhood speech disorder: Gene discovery highlights transcriptional dysregulation. Neurology 2020	PMID: 32345733
AAK1	616405	Hildebrand MS et al.; Severe childhood speech disorder: Gene discovery highlights transcriptional dysregulation. Neurology 2020	PMID: 32345733
CHD3	602120	Eising E et al.; A set of regulatory genes co-expressed in embryonic human brain is implicated in disrupted speech development. Mol Psychiatry 2019	PMID: 29463886
SETD1A	611052	Eising E et al.; A set of regulatory genes co-expressed in embryonic human brain is implicated in disrupted speech development. Mol Psychiatry 2019	PMID: 29463886 - PMID: 36117209
WDR5	609012	Eising E et al.; A set of regulatory genes co-expressed in embryonic human brain is implicated in disrupted speech development. Mol Psychiatry 2019	PMID: 32345733
KAT6	617011	Eising E et al.; A set of regulatory genes co-expressed in embryonic human brain is implicated in disrupted speech development. Mol Psychiatry 2019	PMID: 32345733
SETBP1	611060	Eising E et al.; A set of regulatory genes co-expressed in embryonic human brain is implicated in disrupted speech development. Mol Psychiatry 2019	PMID: 29463886 - PMID: 36117209
ZFHX4	606940	Eising E et al.; A set of regulatory genes co-expressed in embryonic human brain is implicated in disrupted speech development. Mol Psychiatry 2019	PMID: 32345733
TNRC6B	610740	Eising E et al.; A set of regulatory genes co-expressed in embryonic human brain is implicated in disrupted speech development. Mol Psychiatry 2019	PMID: 32345733
MKL2	609463	Eising E et al.; A set of regulatory genes co-expressed in embryonic human brain is implicated in disrupted speech development. Mol Psychiatry 2019	PMID: 32345733
ARHGEF9	300429	Kaspi A et al.; Genetic aetiologies for childhood speech disorder: novel pathways co-expressed during brain development. Mol Psychiatry 2022	PMID: 36658335
DDX3X		Kaspi A et al.; Genetic aetiologies for childhood speech disorder: novel pathways co-expressed during brain development. Mol Psychiatry 2022	PMID: 36658335
KDM5C	314690	Kaspi A et al.; Genetic aetiologies for childhood speech disorder: novel pathways co-expressed during brain development. Mol Psychiatry 2022	PMID: 36658335
PHF21A	608325	Kaspi A et al.; Genetic aetiologies for childhood speech disorder: novel pathways co-expressed during brain development. Mol Psychiatry 2022	PMID: 36658335
BRPF1	602410	Kaspi A et al.; Genetic aetiologies for childhood speech disorder: novel pathways co-expressed during brain development. Mol Psychiatry 2022	PMID: 36658335
PURA	600473	Kaspi A et al.; Genetic aetiologies for childhood speech disorder: novel pathways co-expressed during brain development. Mol Psychiatry 2022	PMID: 36658335
ZBTB18	608433	Kaspi A et al.; Genetic aetiologies for childhood speech disorder: novel pathways co-expressed during brain development. Mol Psychiatry 2022	PMID: 36658335
HNRNPK	600712	Kaspi A et al.;Genetic aetiologies for childhood speech disorder: novel pathways co-expressed during brain development. Mol Psychiatry 2022	PMID: 36658335
SETD1B	611055	Kaspi A et al.; Genetic aetiologies for childhood speech disorder: novel pathways co-expressed during brain development. Mol Psychiatry 2022	PMID: 36658335
RBFOX3	616999	Kaspi A et al.; Genetic aetiologies for childhood speech disorder: novel pathways co-expressed during brain development. Mol Psychiatry 2022	PMID: 36658335
TAOK2	613199	Kaspi A et al.; Genetic aetiologies for childhood speech disorder: novel pathways co-expressed during brain development. Mol Psychiatry 2022	PMID: 36658335
SPAST	604277	Kaspi A et al.; Genetic aetiologies for childhood speech disorder: novel pathways co-expressed during brain development. Mol Psychiatry 2022	PMID: 36658335
SHANK3	606230	Kaspi A et al.; Genetic aetiologies for childhood speech disorder: novel pathways co-expressed during brain development. Mol Psychiatry 2022	PMID: 36658335
DIP2C	611380	Kaspi A et al.; Genetic aetiologies for childhood speech disorder: novel pathways co-expressed during brain development. Mol Psychiatry 2022	PMID: 36658335
ERF	611888	Kaspi A et al.; Genetic aetiologies for childhood speech disorder: novel pathways co-expressed during brain development. Mol Psychiatry 2022	PMID: 36658335
TRIP12	604506	Kaspi A et al.; Genetic aetiologies for childhood speech disorder: novel pathways co-expressed during brain development. Mol Psychiatry 2022	PMID: 36658335
