# Supplementary material for: Expanding the molecular landscape of childhood apraxia of speech: evidence from a single-center experience
Source: Front Neurosci. 2024 Sep 24;18:1396240. doi: 10.3389/fnins.2024.1396240 (PMC11459770; doi:10.3389/fnins.2024.1396240)
Supplement: Supplementary file 2 [file Table_2.xlsx]

## Sheet: Foglio1
Supplementary Table 2: Chromosome microarray analysis (CMA) results											Supplementary Table3. Phenotype severity
Sample	Age	Years	Chromosome	CNV	CMA Findings (hg19)	Size Mbp	Inheritance	Candidate Genes/Loci (Reference)	CNV classification	Disorder	Speech severity score	Language severity score	Performance Intelligence Quotient
1	59	4.92	11	12q13.3 duplication	12q13.13(51554260-51928346)x3	0,374Mbp±0,100Mbp	inheritet from affected father	0,374Mb Mbp duplication	Uncertain significance	Childhood apraxia of speech (CAS), expressive language impairment, normal non-verbal cognitive skills	5	2	122
2	89	7.42	9	9q34.2q34.3 duplication	9q34.2q34.3(137321363-137619429)x3	0,298Mbp±0,100Mbp 298067	maternal	0,298 Mbp duplication	Uncertain significance	CAS, receptive-expressive language impairment, normal non-verbal cognitive skills	4	4	100
3			15	15q26.1 duplication	15q26.1(89349006-89802278)x3	0,456Mbp±0,100Mbp	inheritet from affected father	0,453Mbp duplication	Uncertain significance	CAS, expressive grammar impairment, normal non-verbal cognitive skills	3	1	104
4	85	7.08	4	4q28.1 deletion	4q28.1(127722226-127994826)x1	0,273Mbp±0,100Mbp	inheritet from affected father	0,273Mbp deletion	Uncertain significance	CAS, receptive-expressive language impairment, normal non-verbal cognitive skills	5	3	89
5	60	5	7	7q35 duplication	7q35(145208734-146558801)x3	1,350Mbp±0,100Mbp	maternal	CNTNAP2 [MIM *604569]	Uncertain significance	CAS, receptive- expressive language impairment, borderline non-verbal cognitive skills	4	4	80
6	70	5.83	8	8p23.33-23.1 duplication	8p23.3p23.1(221611-6914076)x3	6,692Mbp±0,100Mbp	inheritet from affected father	CSMD1 [MIM *608397]	Uncertain significance	CAS, expressive language impairment, normal non-verbal cognitive skills	4	2	111
7	121	10.08	7	7q21.3 deletion	7q21.3(93355870-93516838)x1	0,161Mbp±0,050Mbp	paternal	VPS50 [MIM* 616465]	Uncertain significance	CAS, expressive language impairment, normal non-verbal cognitive skills	5	2	85
			10	10q26.2 duplication	10q26.2(129846011-129977860)x3	0,132Mbp±0,050Mbp	maternal	EBF3 [MIM* 607407]	Uncertain significance
8	94	7.83	2	2p24.3-24 duplication	2p24.3p24.2(15169762-18099428)x3	2,930Mbp±0,100Mbp	maternal	MYCN [MIM* 164280]	Uncertain significance	CAS, expressive grammar impairment, normal non-verbal cognitive skills	2	1	118
9	62	5.17	17	5p13.2 duplication	5p13.2(37121845-37738033)x3 mat	0,616Mbp±0,100Mbp	maternal	CPLANE1 [MIM*614571]	Uncertain significance (Hot VUS)	CAS, expressive grammar impairment, normal non-verbal cognitive skills	5	1	127
10	56	4.67	X	Xp22.31 deletion	Xp22.31(6552712-8115153)x0	1,562Mbp±0,100Mbp	unknown	STS [MIM* 308100]	Pathogenic	CAS, receptive-expressive language impairment, borderline non-verbal cognitive skills	5	3	78
11	59	4.92	X	Xq25.1 deletion	Xq25(120918796_121143341)x 0 mat	0.224Mbp±0,100Mbp	maternal	SLC25A43 [MIM* 300641]	Uncertain significance	CAS, receptive-expressive language impairment, borderline non-verbal cognitive skills	5	3	98
12	48	4	20	20p12.3 deletion	20p12.3(8256690_8293150)x1	0.036Mbp±0,100Mbp	inhertied from affected father	PLCB1 [MIM*607120]	Uncertain significance	CAS, receptive-expressive language impairment, borderline non-verbal cognitive skills	5	4	113
			X	Xq22.1duplication	Xq22.1(101637722_101782253)x2	0.144Mbp±0,100Mbp	NA	NXF2 [MIM* 300315] - TMSB15A [MIM* 300939]	Uncertain significance	CAS, receptive-expressive language impairment, borderline non-verbal cognitive skills
13	69	5.75	16	16p11.2 deletion	16p11.2(29673954-30198600)x1	0,524Mbp±0,100Mbp	de novo	Chromosome 16p11.2 deletion syndrome [MIM * 611913]	Pathogenic	CAS, receptive-expressive language impairment, borderline non-verbal cognitive skills	5	4	91
14	74	6.17	4	4p16.1 deletion	4p16.1(8461355-8575359)x1	0,114Mbp±0,100Mbp	maternal	0,114Mbp deletion	Uncertain significance	CAS, receptive-expressive language impairment, normal non-verbal cognitive skills	5	4	108
			8	8q23.3 deletion	8q23.3(114006907-114131155)x1	0,124Mbp±0,100Mbp	paternal	CSMD3 [*608399]	Uncertain significance
15	62	5.17	11	11q22.1q23.3 deletion	11q22.1q23.3(101323715-115915748)x1	14,592Mbp±0,100Mbp	de novo	GRIA4 [* 617864]; ALKBH8 [*618504]	Pathogenic	CAS, receptive-expressive language impairment, borderline non-verbal cognitive skills	5	4	76
16	53	4.42	4	4q25q26 deletion	4q25q26(112753364-118097329)x1	5,344Mbp±0,100Mbp	de novo	5.3 Mbp deletion	Pathogenic?	CAS, expressive language impairment, normal non-verbal cognitive skills	3	2	100
17	87	7.25	16	16p11.2 deletion	16p11.2(29673954-30198600)x1	0,524Mbp±0,100Mbp	de novo	Chromosome 16p11.2 deletion syndrome [MIM * 611913]	Pathogenic	CAS, receptive-expressive language impairment, borderline non-verbal cognitive skills	5	4	87
18	32	2.67	6	6q12 deletion	6q12(67833759-68417052)x 1	0,583Mbp±0,100Mbp	unknown	no genes	Uncertain significance	CAS, expressive language impairment, normal non-verbal cognitive skills	5	4	100
19	137	11.42	3	3q29 deletion	3q29(195777965-197310451)x1	1,532Mbp±0,100Mbp	maternal, brother also has it	Chromosome 3q29 microdeletion syndrome [MIM * 609425]	Pathogenic	CAS, expressive language impairment, normal non-verbal cognitive skills	4	2	111
20	54	4.5	20	20p12.1 deletion	20p12.1(14629182x2, 14700040_14944214x1,14991493x2)	0.244Mbp±0,100Mbp	maternal	MACROD2 [*611567]	Uncertain significance	CAS, expressive grammar impairment, normal non-verbal cognitive skills	2	1	118
21	92	7.67	16	16p11.2 deletion	16p11.2(29673954-30198600)x1	0,524Mbp±0,100Mbp	de novo	Chromosome 16p11.2 deletion syndrome [MIM * 611913]	Pathogenic	CAS receptive-espressive language impairment, nomal non-verbal cognitive skills	5	4	85
			Y	Yq11.23 duplication	Yq11.23(28478559-28660436)x2	0,181Mbp±0,100Mbp	paternal	0,181Mbp duplication	Benign
22	51	4.25	16	16p13.3 duplication	16p13.3 (2904800-2963720)x3	0.059Mbp±0,100Mbp	unknown	PRSS22 [*609343], FLYWCH2 [*620431], FLYWCH1 [*620431]	Uncertain significance		5	2	111
			X-Y	Xp22.33 or Yp11.31duplication	Xp22.33 or Yp11.31(1539335_1611387 or 1489335_1561387)X3	0.072Mbp±0,100Mbp	unknown	ASMTL [*300162],P2RY8 [*300525]	Uncertain significance	CAS, expressive language impairment, normal non-verbal cognitive skills
23	115	9.58	16	16p11.2 deletion	16p11.2(29673954-30198600)x1	0,524Mbp±0,100Mbp	unknown	Chromosome 16p11.2 deletion syndrome [MIM * 611913]	Pathogenic	CAS, normal language and non-verbal cognitive skills	3	1	108
24	74	6.17	16	16p11.2 deletion	16p11.2(29673954-30198600)x1	0,525Mbp±0,100Mbp	paternal	Chromosome 16p11.2 deletion syndrome [MIM * 611913]	Pathogenic	CAS, receptive-expressive language impairment, normal non-verbal cognitive skills	5	4	91
25	47	3.92	5	5q12.1 duplication	5q12.1(60216101-60300675)x3	0,084Mbp±0,050Mbp	unknown	ERCC8 [*216400]	Uncertain significance	CAS, receptive-expressive language impairment, normal non-verbal cognitive skills	4	4	119
26	54	4.5	3	3q21.3 duplication	3q21.3(128485014_128686023)x3	0.64Mbp±0,100Mbp	paternal	RAB7A [MIM* 600882], ACAD9 [MIM* 611126]	Uncertain significance	CAS, receptive-expressive language impairment, normal non-verbal cognitive skills	5	2	107
			11	11p13 deletion	11p13(33937387-34581028)x1	0.64Mbp±0,100Mbp	de novo	CAPRIN1 [MIM * 620636], NAT10 [* 609221], CAT [MIM *6140971] ELF5 [* 605169],	Uncertain significance
27	50	4.16667	-	NO CNV						CAS, receptive-expressive language impairment, normal non-verbal cognitive skills	4	3	100
28	50	4.16667	-	NO CNV						CAS, receptive-expressive language impairment, normal non-verbal cognitive skills	4	3	111
29	97	8.08333	-	NO CNV						CAS, receptive-expressive language impairment, borderline non-verbal cognitive skills	5	3	78
30	59	4.91667	-	NO CNV						CAS, expressive grammar impairment, normal non-verbal cognitive skills	5	2	102
31	57	4.75	-	NO CNV						CAS, expressive language impairment, normal non-verbal cognitive skills	4	1	107
32	78	6.5	-	NO CNV						CAS, expressive grammar language impairment, normal non-verbal cognitive skills	5	3	89
33	98	8.16667	-	NO CNV						CAS, expressive grammar language impairment, normal non-verbal cognitive skills	4	1	117
34	78	6.5	-	NO CNV						CAS, receptive-expressive language impairment, normal non-verbal cognitive skills	4	3	104
35	159	13.25	-	NO CNV						CAS, expressive grammar impairment, normal non-verbal cognitive skills	4	1	139
36	84	7	-	NO CNV						CAS, receptive-expressive language impairment, normal non-verbal cognitive skills	5	4	85
37	57	4.75	-	NO CNV						CAS, receptive-expressive language impairment, normal non-verbal cognitive skills	5	4	89
38	51	4.25	-	NO CNV						CAS, receptive-expressive language impairment, normal non-verbal cognitive skills	5	4	98
39	52	4.33333	-	NO CNV						CAS, expressive grammar impairment, normal non-verbal cognitive skills	5	1	127
40	83	6.91667	-	NO CNV						CAS, receptive-expressive language impairment, normal non-verbal cognitive skills	5	4	107
41	108	9	-	NO CNV						CAS, receptive-expressive language impairment, normal non-verbal cognitive skills	3	3	91
42	53	4.41667	-	NO CNV						CAS, expressive grammar impairment, normal non-verbal cognitive skills	4	1	123
43	94	7.83333	-	NO CNV						CAS, receptive-expressive language impairment, borderline non-verbal cognitive skills	5	2	78
44	136	11.3333	-	NO CNV						CAS, receptive-expressive language impairment, borderline non-verbal cognitive skills	5	3	81
45	63	5.25	-	NO CNV						CAS, receptive-expressive language impairment, normal non-verbal cognitive skills	5	3	104
46	65	5.41667	-	NO CNV						CAS, receptive-expressive language impairment, normal non-verbal cognitive skills	4	4	104
47	78	6.5	-	NO CNV						CAS, normal language and non-verbal cognitive skills	4	0	137
48	50	4.16667	-	NO CNV						CAS, expressive grammar impairment, normal non-verbal cognitive skills	5	1	122
49	63	5.25	-	NO CNV						CAS, expressive language impairment, normal non-verbal cognitive skills	5	2	115
50	43	3.58333	-	NO CNV						CAS, expressive language impairment, normal non-verbal cognitive skills	4	1	109
51	68	5.66667	-	NO CNV						CAS, receptive-expressive language impairment, normal non-verbal cognitive skills	5	3	91
52	48	4	-	NO CNV						CAS, receptive-expressive language impairment, normal non-verbal cognitive skills	5	2	113
53	50	4.16667	-	NO CNV						CAS, expressive language impairment, normal non-verbal cognitive skills	5	2	93
54	50	4.16667	-	NO CNV						CAS, receptive-expressive language impairment, normal non-verbal cognitive skills	5	3	91
55	90	7.5	-	NO CNV						CAS, expressive language impairment, normal non-verbal cognitive skills	5	2	104
56	57	4.75	-	NO CNV						CAS, expressive language impairment, normal non-verbal cognitive skills	5	2	127
57	91	7.58333	-	NO CNV						CAS, receptive-expressive language impairment, borderline non-verbal cognitive skills	4	4	74
58	47	3.91667	-	NO CNV						CAS, expressive language impairment, normal non-verbal cognitive skills	5	2	97
59	64	5.33333	-	NO CNV						CAS, expressive grammar impairment, normal non-verbal cognitive skills	5	1	127
60	90	7.5	-	NO CNV						CAS, receptive-expressive language impairment, normal non-verbal cognitive skills	4	3	106
61	61	5.08333	-	NO CNV						CAS, expressive grammar impairment, normal non-verbal cognitive skills	5	1	103
62	76	6.33333	-	NO CNV						CAS, receptive-expressive language impairment, borderline non-verbal cognitive skills	4	4	76
63	57	4.75	-	NO CNV						CAS, receptive-expressive language impairment, normal non-verbal cognitive skills	4	3	104
64	55	4.58333	-	NO CNV						CAS, expressive language impairment, normal non-verbal cognitive skills	5	2	100
65			-	NO CNV						CAS, expressive language impairment, normal non-verbal cognitive skills	5	1	97
66	49	4.08333	-	NO CNV						CAS, expressive language impairment, normal non-verbal cognitive skills	5	2.5	102
67	66	5.5	-	NO CNV						CAS, expressive language impairment, normal non-verbal cognitive skills	5	1	115
68	126	10.5	-	NO CNV						CAS, receptive-expressive language impairment, borderline non-verbal cognitive skills	4	3	71
69			-	NO CNV						CAS, receptive-expressive language impairment, borderline non-verbal cognitive skills
* MIM: online Mendelian inheritance in man (OMIM) database
* Speech Composite Severity Score: range 0 (no impairment)-5 (severe impairment across all the speech measures). Each altered speech measure (consonantal inventory, inaccuracy, inconsistency, syllable omissions, diadochokinetic rate) contributes one point to the composite score.
** Language Composite Severity Score: range 0 (no impairment)-4 (severe impairment across all the language measures). Each altered language measure (expressive and receptive lexicon, expressive and receptive grammar) contributes one point to the composite score.
