# Supplementary material for: Expanding the molecular landscape of childhood apraxia of speech: evidence from a single-center experience
Source: Front Neurosci. 2024 Sep 24;18:1396240. doi: 10.3389/fnins.2024.1396240 (PMC11459770; doi:10.3389/fnins.2024.1396240)
Supplement: Supplementary file 4 [file Table_4.xlsx]

## Sheet: Foglio1
Supplementary Table 4. Enrichment analysis of c.214-7C>T variants in HTR3B gene in our CAS cases
		WES-CAS		3000 non-CAS patients (Meyer Children's University Hospital dataset)
Gene	Variation	CAS patients	Patients without c.214-7C>T	Controls with variants	Controls without variants	p-value	fold enrichment	% of gene occurrence in our CAS cases
HTR3B	c.214-7C>T	2	32	1	2999	0.0004	187.44	5.88%
