# Supplementary material for: Expanding the molecular landscape of childhood apraxia of speech: evidence from a single-center experience
Source: Front Neurosci. 2024 Sep 24;18:1396240. doi: 10.3389/fnins.2024.1396240 (PMC11459770; doi:10.3389/fnins.2024.1396240)
Supplement: Supplementary file 5 [file Table_5.xlsx]

## Sheet: Foglio1
Supplementary Table 5- Frequency in populations
	WES-CAS		1000g-Control-Ita			1000g-Control-Eur (FIN-GBR-IBS-CEU)			1000g-Control-Ita+Eur
Gene	CAS patients	Patients without variants	Controls with variants	Controls without variants	p-value	Controls with variants	Controls without variants	p-value	Controls with variants	Controls without variants	p-value combined population	fold enrichment	% of gene occurrence in our CAS cases
UBA6*	3	32	0	107	0.014	1	395	0.0019	1	502	0.001	47.08	8.57%
ZFHX4*	3	33	0	107	0.015	2	394	0.0048	2	501	0.0025	22.78	8.57%
KAT6A*	3	33	0	107	0.015	2	394	0.0048	2	501	0.0025	22.78	8.57%
In bold, germline variants significantly enriched in the CAS patients. *Gene enrichment analysis using our series of 34 CAS cases. For the KAT6A gene, an additional CAS case from Eising et al 2019 and a CAS case from Kaspi et al 2024, both heterozygous for variants in KAT6A, were considered; for the UBA6 gene, a CAS case from Hildebrand et al 2020, heterozygous for a variant in the UBA6 gene, was…
